# Supplementary material for: Two novel SNS-donor palladium(ii) complexes of benzoxazole and benzothiazole derivatives as potential anticancer agents
Source: Royal Society of Chemistry journal article supplement (doi:10.1039/d4dt02684e), 2024-12-04
Supplement: d4dt02684e1.pdf [file d4dt02684e1.pdf]

## Supplementary Material

# Two novel SNS-donor palladium(II) complexes of benzoxazole and benzothiazole derivatives as potential anticancer agents

Xiaomeng Ma, Yuting Xie, Jiazhen Tang, Jian Xue and Zhanfen Chen\*

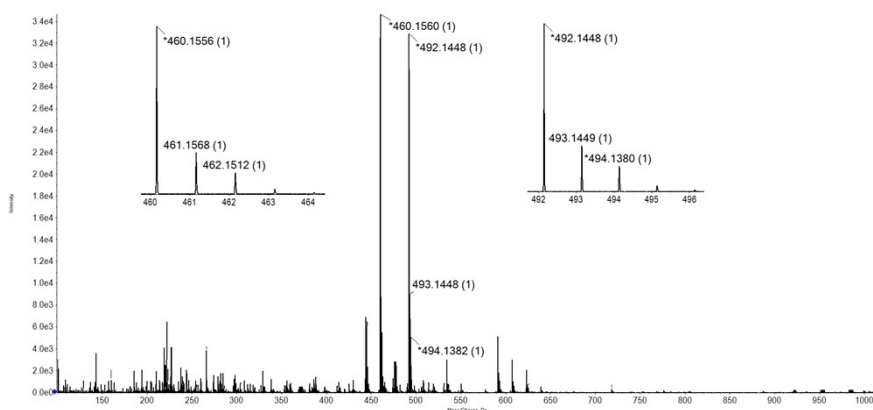

**Fig. S1** High resolution electrospray ionization-mass spectrum (HRMS, ESI) of **L<sub>2</sub>** in methanol solution. The signals at  $m/z$  460.1560 and 492.1448 should be assigned to  $[\mathbf{L}_2 + \text{H}]^+$  and  $[\mathbf{L}_2 + \text{H} + \text{CH}_3\text{OH}]^+$ , respectively.

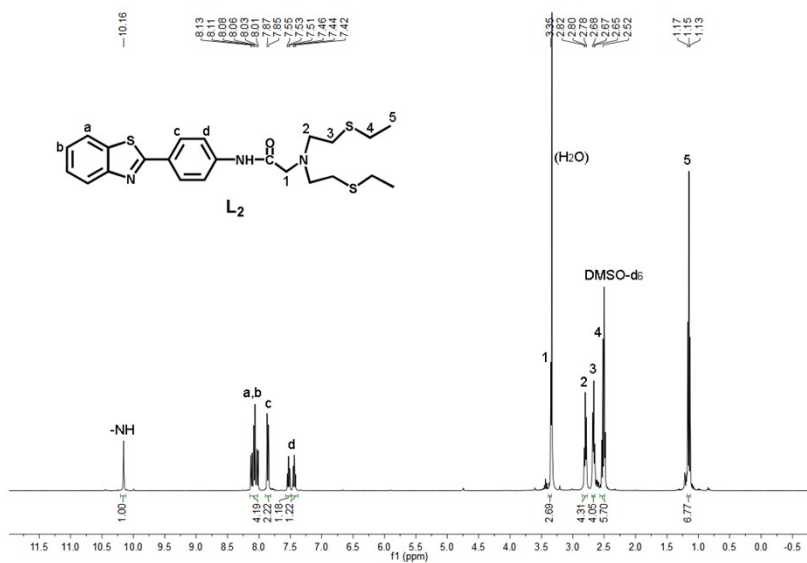



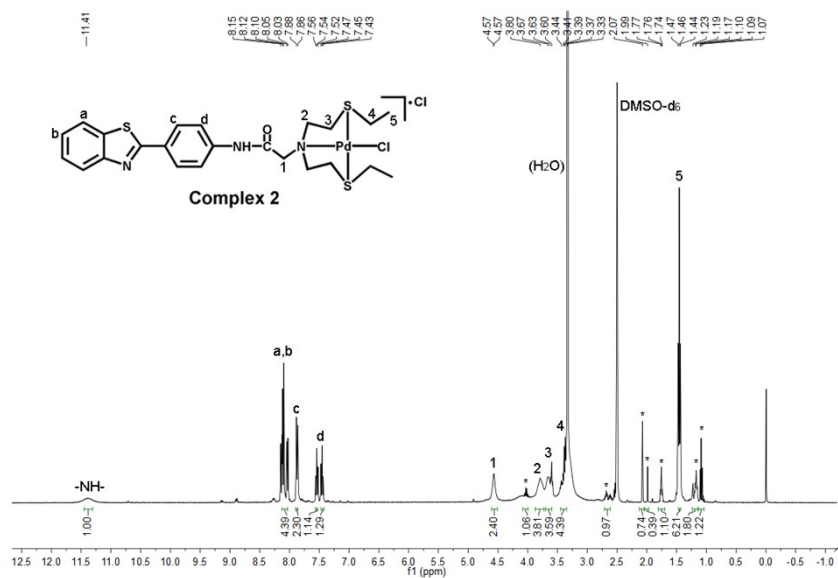

**Fig. S5**  $^1\text{H}$  NMR of complex **2** ( $[\text{PdL}_2\text{Cl}]\text{Cl}$ ) in  $\text{DMSO-}d_6$ . The signals marked with \* are for the protons from residual solvents ethyl acetate, acetone, and diethyl ether.

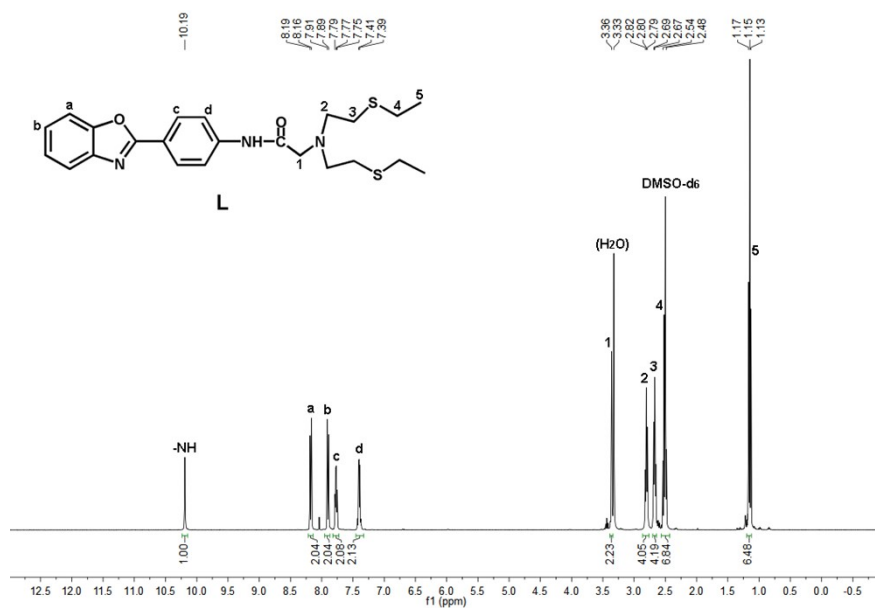

**Fig. S6**  $^1\text{H}$  NMR of ligand **L**<sub>1</sub> in  $\text{DMSO-}d_6$ .

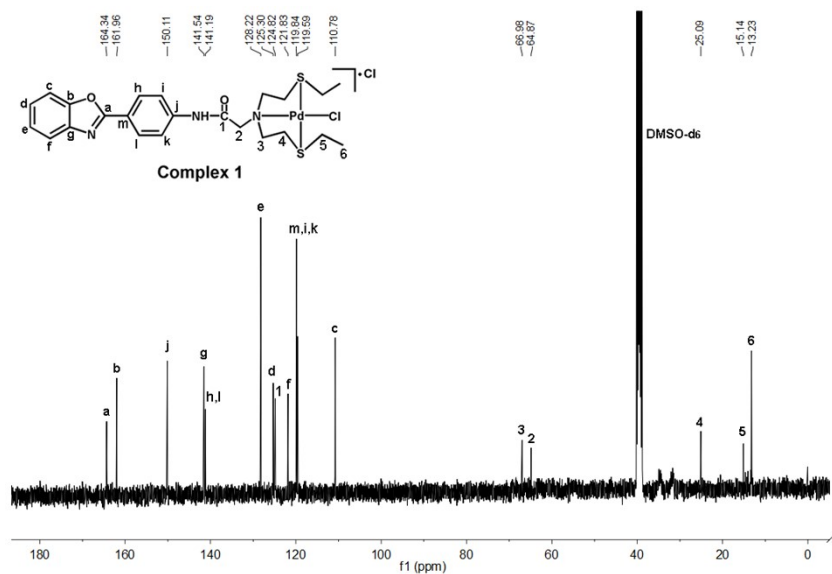

**Fig. S7** <sup>13</sup>C NMR of complex 1 ([PdL<sub>1</sub>Cl]Cl) in DMSO-*d*<sub>6</sub>.

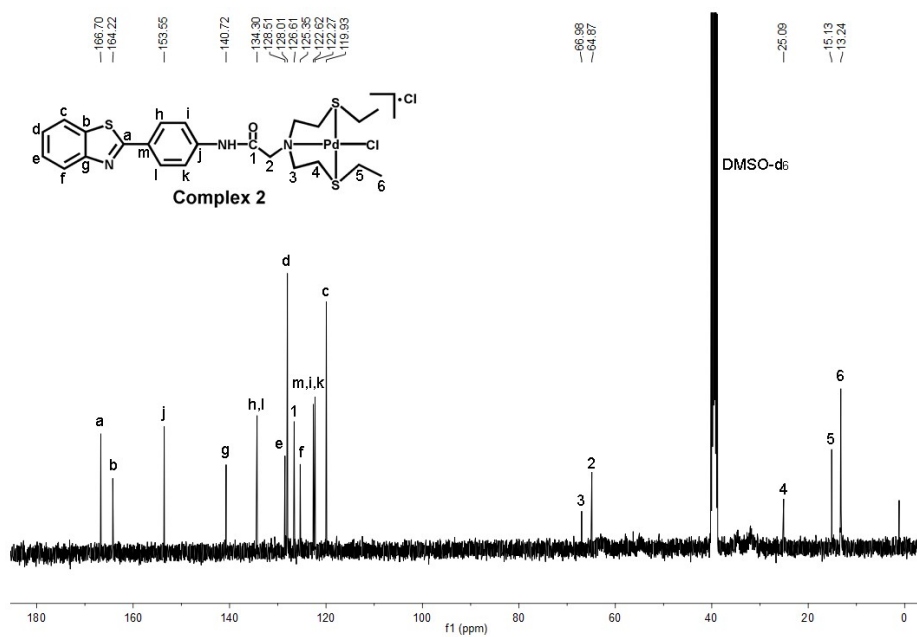

**Fig. S8** <sup>13</sup>C NMR of complex 2 ([PdL<sub>2</sub>Cl]Cl) in DMSO-*d*<sub>6</sub>.

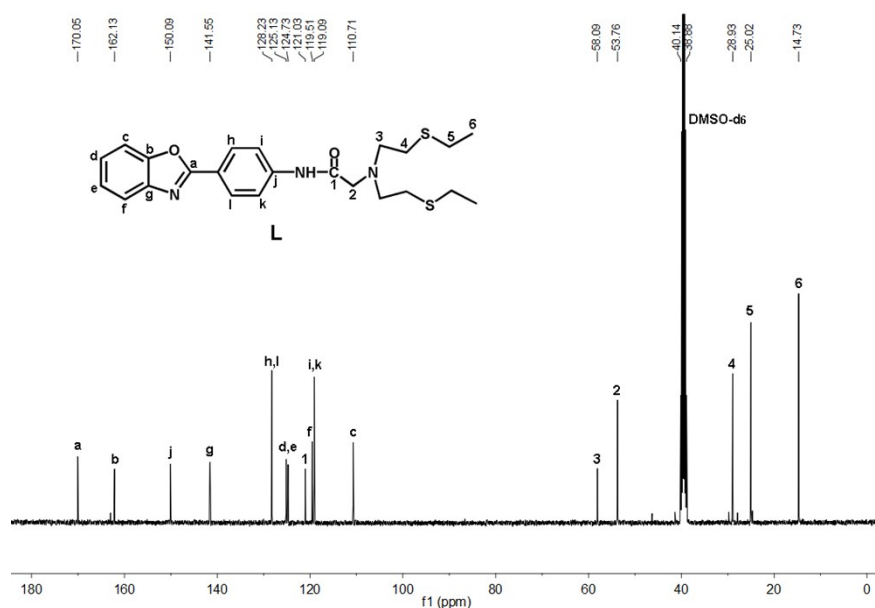

**Fig. S9**  $^{13}\text{C}$  NMR of ligand  $\text{L}_1$  in  $\text{DMSO-}d_6$ .

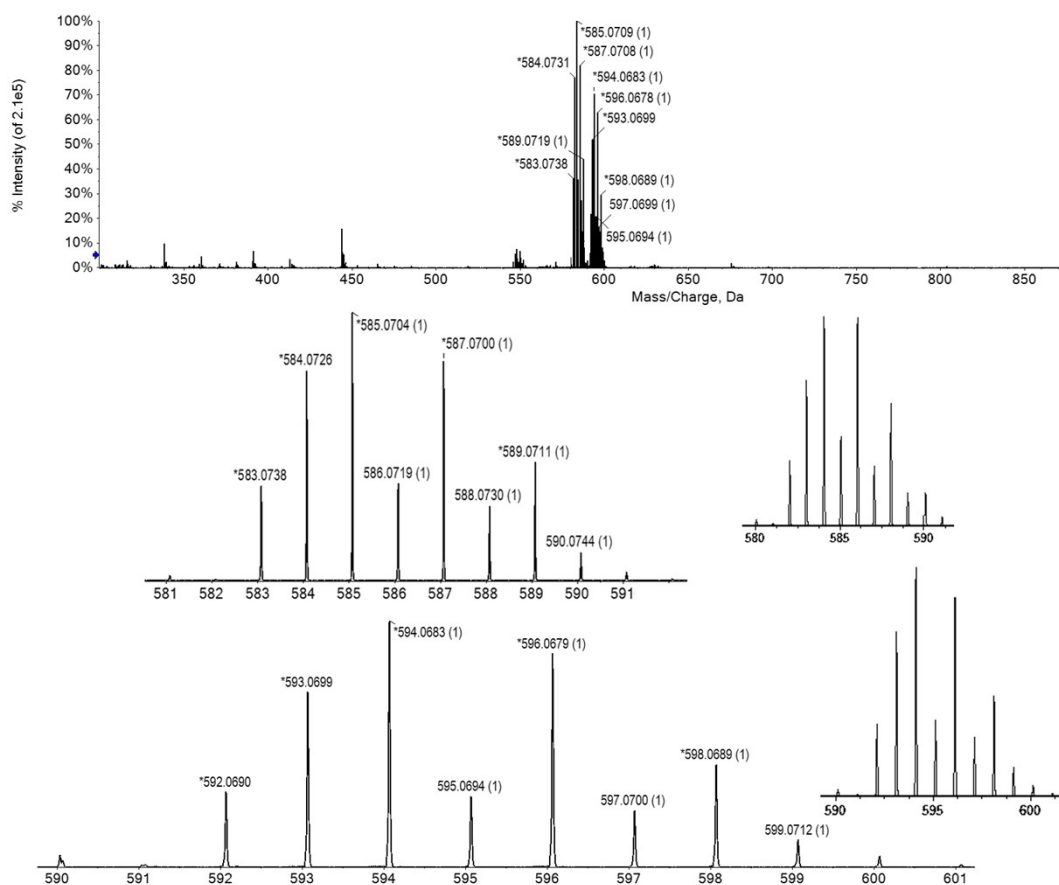

**Fig. S10** High resolution electrospray ionization-mass spectrum (HRMS, ESI) of **1** in methanol solution. The signals at  $m/z$  585.0709 and 594.0683 should be assigned to  $[\text{M} - \text{Cl}]^+$  and  $[\text{M} - 2\text{Cl} + \text{CH}_3\text{CHO}]^+$ , respectively ( $\text{M} = [\text{PdL}_1\text{Cl}]\text{Cl}$ ).

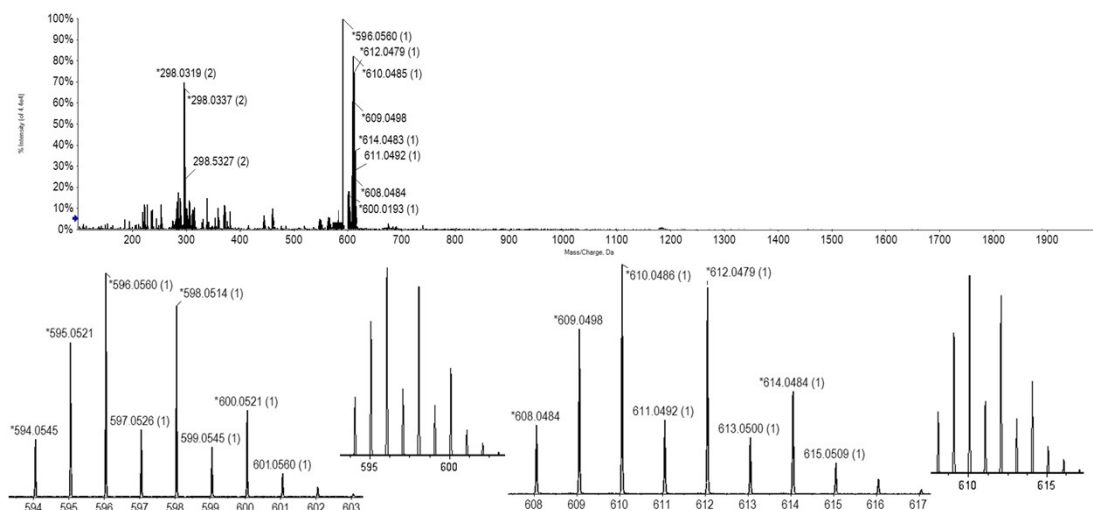

**Fig. S11** High resolution electrospray ionization-mass spectrum (HRMS, ESI) of complex **2** in methanol solution. The signals at  $m/z$  298.0319, 596.0560, and 610.0485 should be assigned to  $[M - 2Cl + CH_3OH]^{2+}$ ,  $[M - 2Cl + CH_3O]^+$ , and  $[M - 2Cl + CH_3CH_2O]^+$ , respectively ( $M = [PdL_2Cl]Cl$ ).

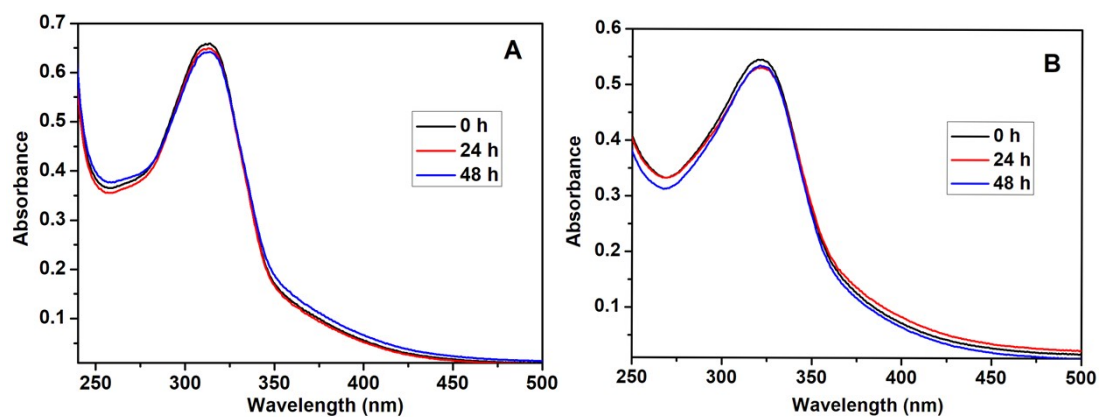

**Fig. S12** Time-dependent UV-vis absorption spectra of complex **1** (A) or **2** (B) (25  $\mu$ M) in cell culture media (Dulbecco's modified Eagle's medium (DMEM)) with 0.3% DMSO at 37  $^{\circ}$ C.

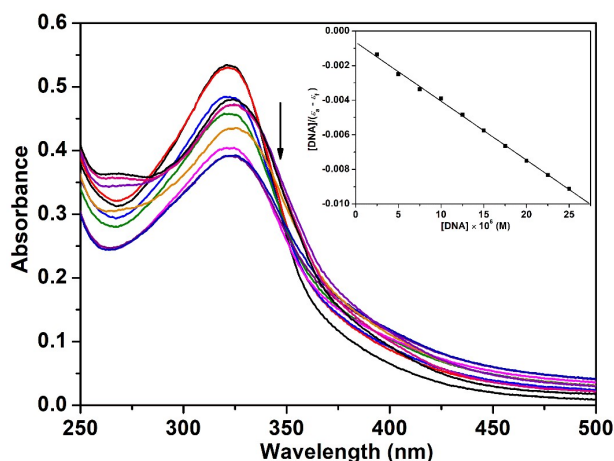

**Fig. S13** Absorption spectra of complex **2** ( $[\text{complex}] = 25 \mu\text{M}$ ) in the absence and presence of an increasing amount of CT-DNA (2.5, 5.0, 7.5, 10.0, 12.5, 15.0, 17.5, 20.0, 22.5, and 25.0  $\mu\text{M}$ ) at 37 °C after 24 h of incubation in Tris-HCl/NaCl buffer (pH 7.4). The inset shows the plot of  $[\text{DNA}]/(\varepsilon_a - \varepsilon_f)$  vs.  $[\text{DNA}]$ .

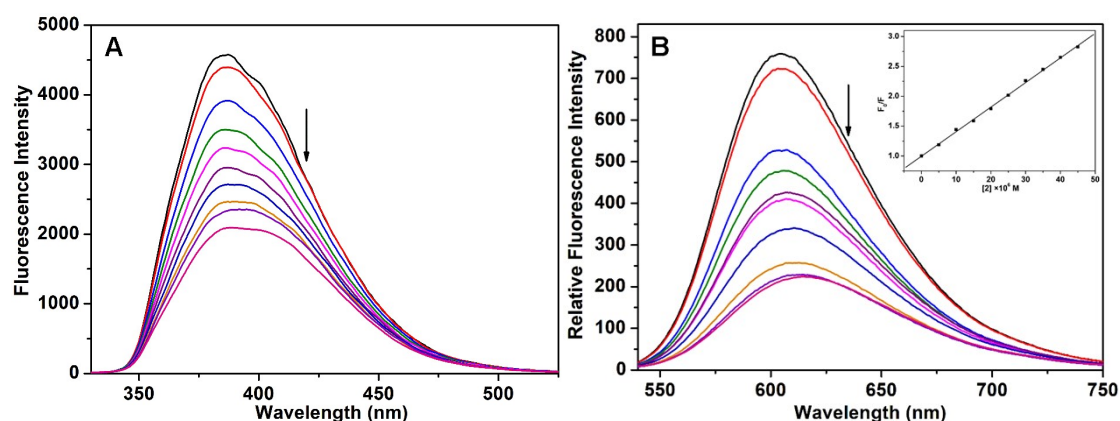

**Fig. S14** (A) Fluorescence emission spectra of complex **2** (10  $\mu\text{M}$ ,  $\lambda_{\text{ex}} = 316 \text{ nm}$ ) in the absence (black line) and presence (color lines) of CT-DNA ( $r = [\text{DNA}]/[\text{2}] = 0.1, 0.2, 0.3, 0.4, 0.5, 0.6, 0.7, 0.8, 0.9$ ) at 37 °C after 24 h of incubation. (B) Fluorescence emission spectra ( $\lambda_{\text{ex}} = 526 \text{ nm}$ ) of the CT-DNA-EB system ( $[\text{DNA}] = [\text{EB}] = 5.68 \times 10^{-6} \text{ M}$ ) in the absence and the presence of complex **1** (5, 10, 15, 20, 25, 30, 35, 40, 45  $\mu\text{M}$ ). Insets: Stern-Volmer plot of the EB-DNA fluorescence titration for **2**.

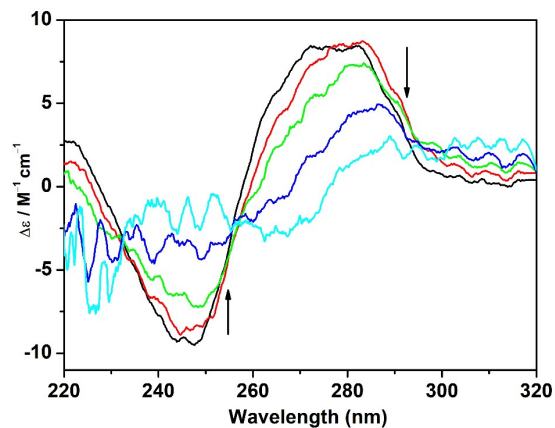

**Fig. S15** CD spectra of CT-DNA ( $1.0 \times 10^{-4}$  M) in the absence (the black solid line) and presence of complex **2** (the color solid lines,  $[\text{complex}]/[\text{DNA}] = 0.2, 0.4, 0.6, 0.8$ ) at  $37^\circ\text{C}$  in pH 7.40 after 24 h of incubation time.

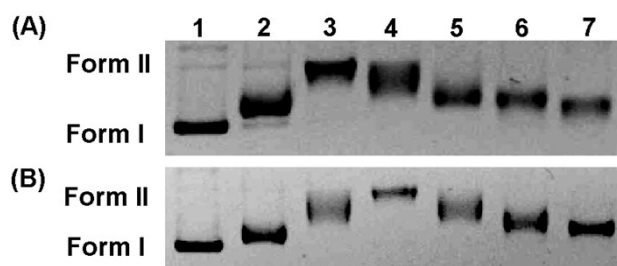

**Fig. S16** Agarose gel electrophoresis patterns of supercoiled pUC19 plasmid DNA incubated with **1** (A) or **2** (B) at  $37^\circ\text{C}$  for 24 h. Lane 1, control; lanes 2–7, the  $r_i$  values of 0.015, 0.03, 0.045, 0.06, 0.12, 0.18, respectively.



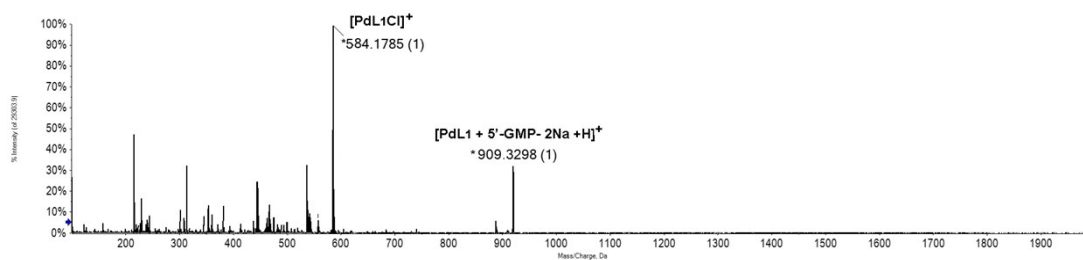

**Fig. S17** High resolution electrospray ionization-mass spectrum (HRMS, ESI) of the reaction between complex **1** and 5'-GMP (1:1) recorded in methanol/water (v/v, 1:1) at 37 °C for 24 h. Assignments: 909.3298,  $[\text{PdL}_1(\text{GMP})-2\text{Na}+\text{H}]^+$  ( $\text{C}_{33}\text{H}_{42}\text{N}_8\text{S}_2\text{O}_{10}\text{PPd}$ , calcd. 911.12); 584.1785,  $[\text{PdL}_1\text{Cl}]^+$  ( $\text{C}_{23}\text{H}_{29}\text{N}_3\text{S}_2\text{O}_2\text{ClPd}$ , calcd. 584.04).

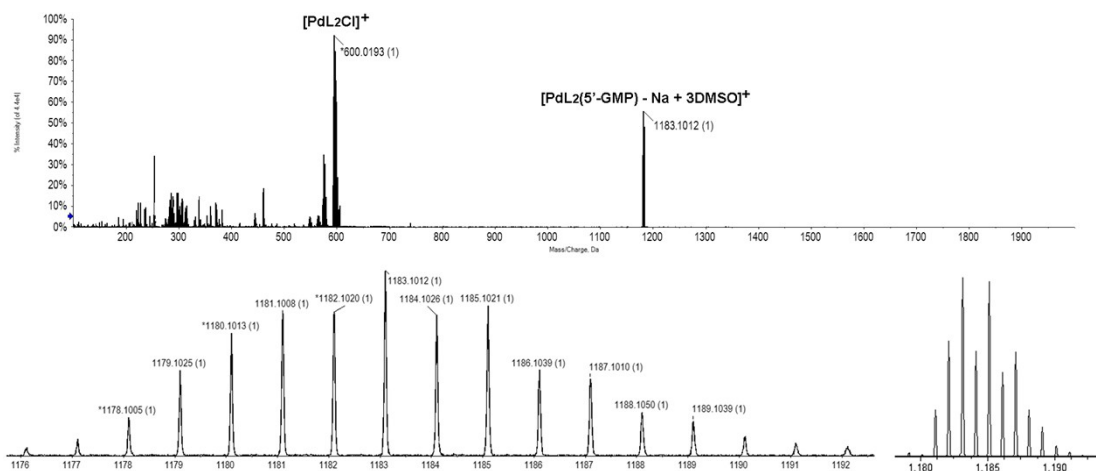

**Fig. S18** High resolution electrospray ionization-mass spectrum (HRMS, ESI) of the reaction between complex **2** and 5'-GMP (1:1) recorded in methanol/water (v/v, 1:1) at 37 °C for 24 h. Assignments: 1183.1012,  $[\text{PdL}_2(\text{GMP})-\text{Na}+3\text{DMSO}]^+$  ( $\text{C}_{39}\text{H}_{59}\text{N}_8\text{S}_6\text{O}_{12}\text{PNaPd}$ , calcd. 1183.12); 600.0193,  $[\text{PdL}_2\text{Cl}]^+$  ( $\text{C}_{23}\text{H}_{29}\text{N}_3\text{S}_3\text{OClPd}$ , calcd. 600.02).

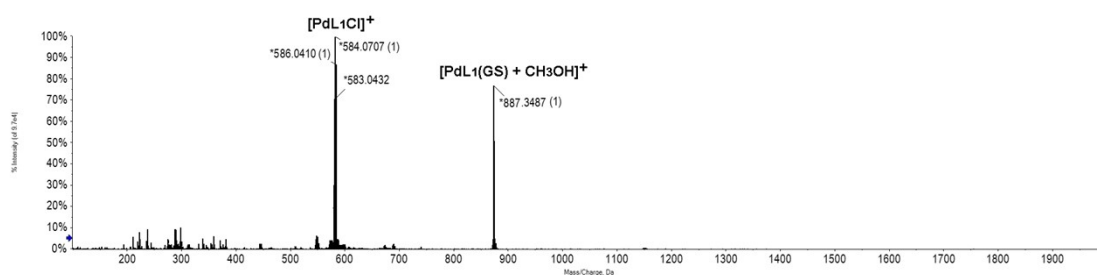

**Fig. S19** High resolution electrospray ionization-mass spectrum (HRMS, ESI) of the reaction between complex **1** and GSH (1:1) recorded in methanol/water (v/v, 1:1) at 37 °C for 24 h. Assignments: 887.3487,  $[\text{PdL}_1(\text{GS}) + \text{CH}_3\text{OH}]^+$  ( $\text{C}_{34}\text{H}_{49}\text{N}_6\text{S}_3\text{O}_9\text{Pd}$ , calcd. 887.17); 584.0707,  $[\text{PdL}_1\text{Cl}]^+$  ( $\text{C}_{23}\text{H}_{29}\text{N}_3\text{S}_2\text{O}_2\text{ClPd}$ , calcd. 584.04).

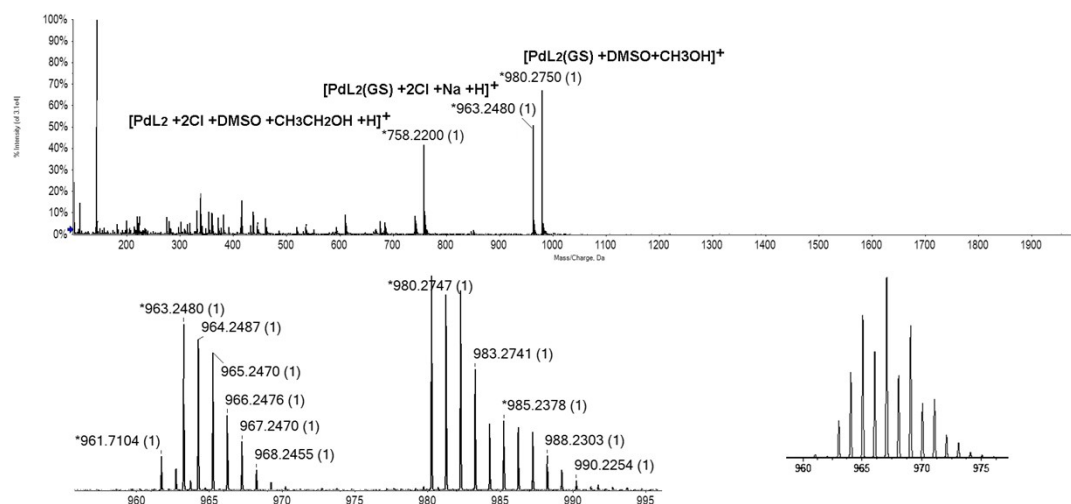

**Fig. S20** High resolution electrospray ionization-mass spectrum (HRMS, ESI) of the reaction between complex **2** and GSH (1:1) recorded in methanol/water (v/v, 1:1) at 37 °C for 24 h. Assignments: 980.2750,  $[\text{PdL}_2(\text{GS}) + \text{DMSO} + \text{CH}_3\text{OH}]^+$  ( $\text{C}_{36}\text{H}_{55}\text{N}_6\text{S}_5\text{O}_9\text{Pd}$ , calcd. 981.17); 963.2480,  $[\text{PdL}_2(\text{GS}) + 2\text{Cl} + \text{Na} + \text{H}]^+$  ( $\text{C}_{33}\text{H}_{45}\text{N}_6\text{S}_4\text{O}_7\text{NaCl}_2\text{Pd}$ , calcd. 964.06); 758.2200,  $[\text{PdL}_2 + 2\text{Cl} + \text{DMSO} + \text{CH}_3\text{CH}_2\text{OH} + \text{H}]^+$  ( $\text{C}_{27}\text{H}_{42}\text{N}_3\text{S}_4\text{O}_3\text{Cl}_2\text{Pd}$ , calcd. 760.02).

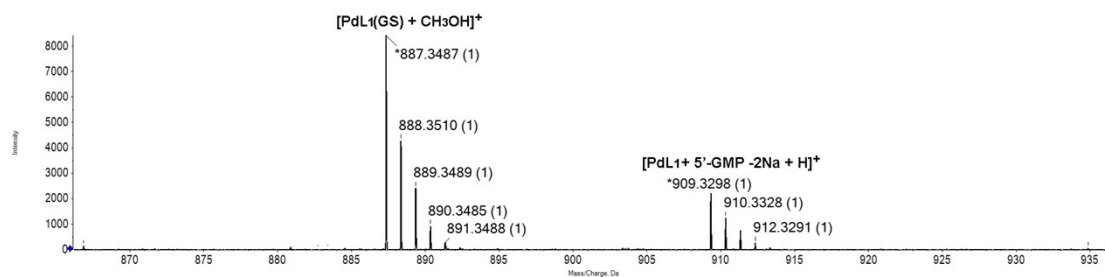

**Fig. S21** High resolution electrospray ionization-mass spectrum (HRMS, ESI) of the competitive reaction between complex **1** with 5'-GMP and GSH (1:1:1) recorded in methanol/water/water (v/v/v, 1:1:1) at 37 °C for 24 h. Assignments: 909.3298,  $[\text{PdL}_1(\text{GMP})-2\text{Na}+\text{H}]^+$  ( $\text{C}_{33}\text{H}_{42}\text{N}_8\text{S}_2\text{O}_{10}\text{PPd}$ , calcd. 911.12); 887.3487,  $[\text{PdL}_1(\text{GS})+\text{CH}_3\text{OH}]^+$  ( $\text{C}_{34}\text{H}_{49}\text{N}_6\text{S}_3\text{O}_9\text{Pd}$ , calcd. 887.17).

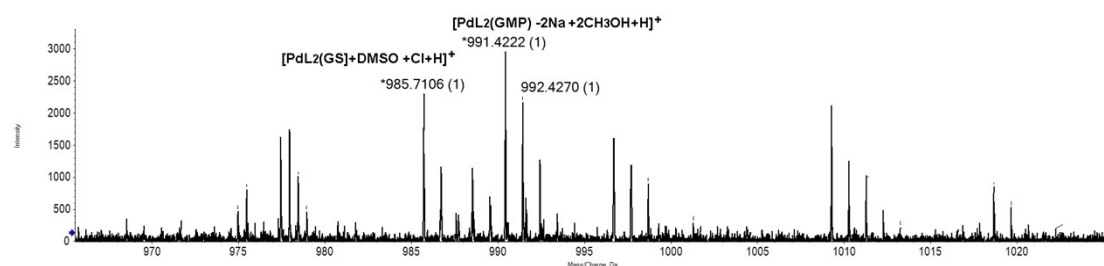

**Fig. S22** High resolution electrospray ionization-mass spectrum (HRMS, ESI) of the competitive reaction between complex **2** with 5'-GMP and GSH (1:1:1) recorded in methanol/water/water (v/v/v, 1:1:1) at 37 °C for 24 h. Assignments: 991.4222,  $[\text{PdL}_2(\text{GMP})-2\text{Na}+2\text{CH}_3\text{OH}+\text{H}]^+$  ( $\text{C}_{35}\text{H}_{50}\text{N}_8\text{S}_2\text{O}_{11}\text{PPd}$ , calcd. 991.15); 985.7106,  $[\text{PdL}_2(\text{GS})+\text{DMSO}+\text{Cl}+\text{H}]^+$  ( $\text{C}_{35}\text{H}_{52}\text{N}_6\text{S}_5\text{O}_8\text{ClPd}$ , calcd. 985.12).
